# Supplementary material for: Salt-tolerant, scalable Janus fabric evaporators for desalination and multi-species wastewater purification
Source: Royal Society of Chemistry journal article supplement (doi:10.1039/d3re00205e), 2023-01-01
Supplement: d3re00205e1.pdf [file d3re00205e1.pdf]

## Supporting Information

### **Salt-tolerant, Scalable Janus Fabric Evaporator for Desalination and Multi-species Wastewater Purification**

Zhi-Jie Zhang<sup>1</sup>, Zhi-Bo Zhang<sup>1</sup>, Jun Zeng<sup>2</sup>, Shan Ma<sup>1</sup>, Min Chen<sup>1</sup>, Dan Zhou<sup>1</sup>, Yong Yan<sup>1</sup>, Zhi Chen<sup>1\*</sup>, Cong-Ming Tang<sup>1</sup>, Jun-Qiang Xu<sup>1</sup>

1.College of Chemistry and Chemical Engineering, Chongqing University of Technology, Chongqing 400054, P. R. China

2. R&D Department of Chongqing Jianfeng Chemical Co., Ltd., P. R. China

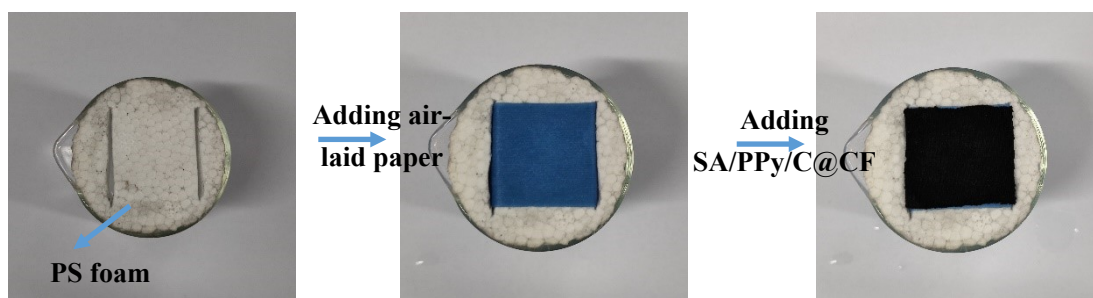

**Fig. S1.** The assembly process of the evaporator.

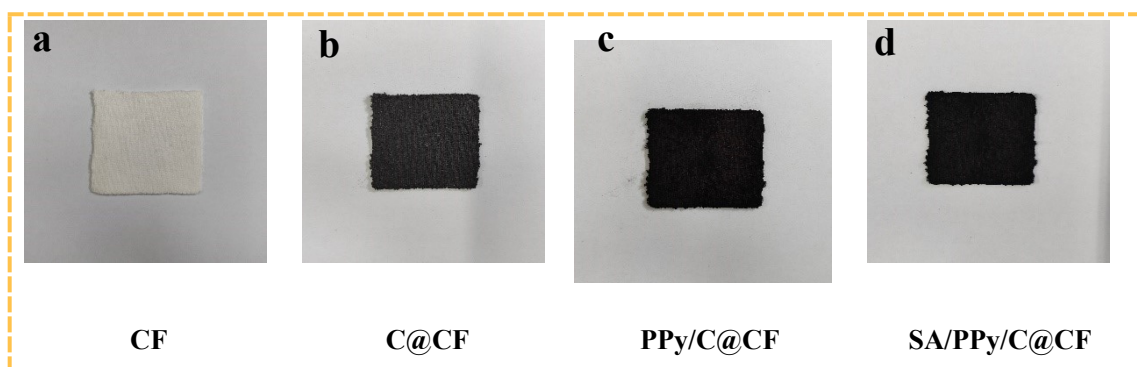

**Fig. S2.** Photographs of (a) CF, (b) C@CF, (c) PPy/C@CF, (d) SA/PPy/C@CF, respectively.

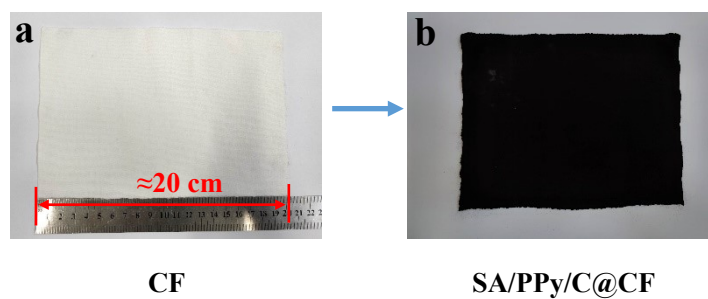

**Fig. S3.** Photographs of a large-size (a) CF and (b) SA/PPy/C@CF.

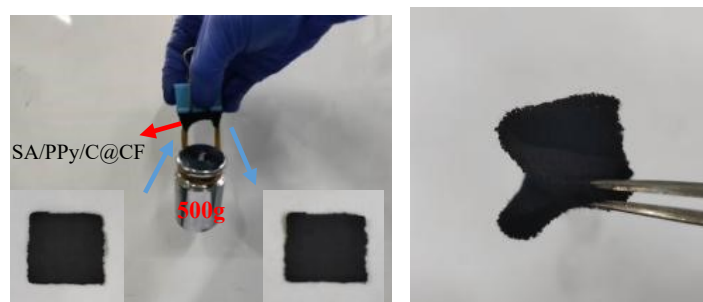

**Fig. S4.** Photographs of SA/PPy/C@CF with excellent mechanical strength and good flexibility.

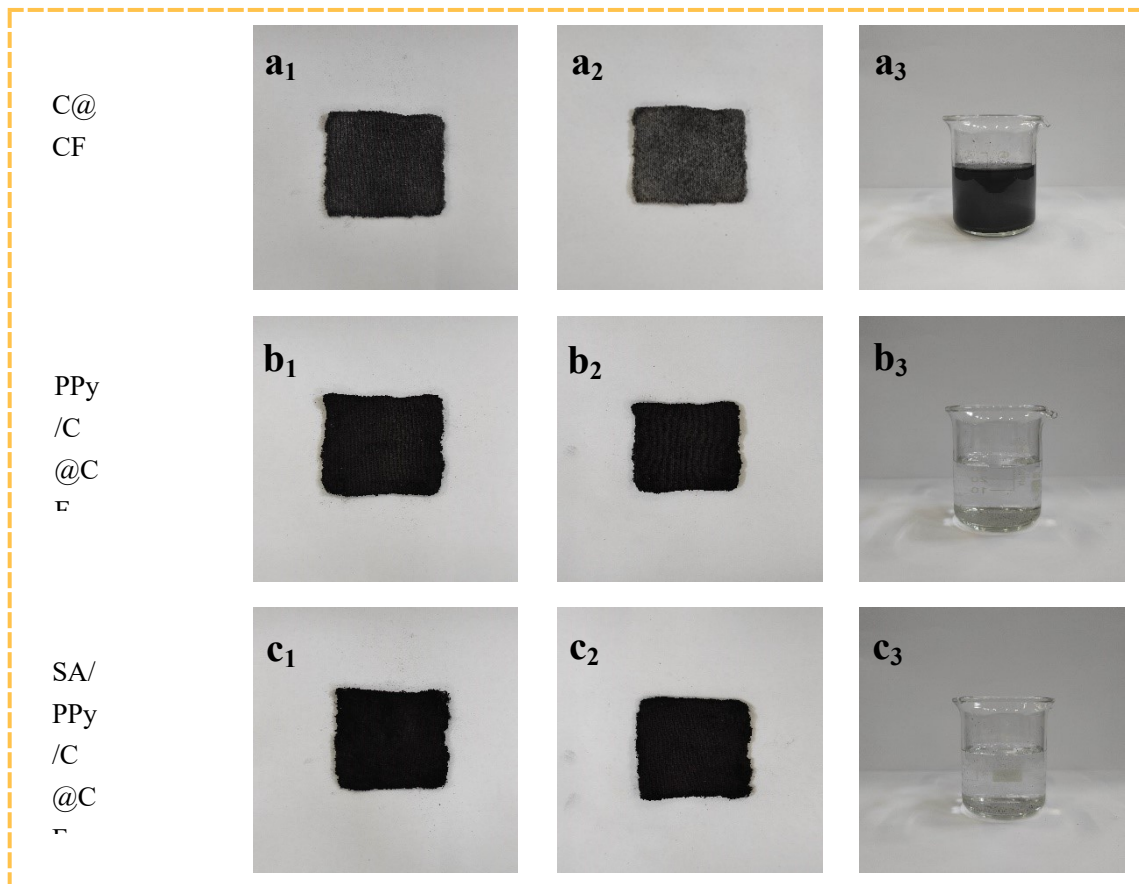

**Fig. S5.** (a<sub>1</sub>, b<sub>1</sub>, c<sub>1</sub>) Photographs of C@CF, PPy/C@CF and SA/PPy/C@CF before sonication in water. (a<sub>2</sub>, b<sub>2</sub>, c<sub>2</sub>) Photographs of C@CF, PPy/C@CF and SA/PPy/C@CF after 30min of sonication in water. (a<sub>3</sub>, b<sub>3</sub>, c<sub>3</sub>) Photographs of aqueous solutions of C@CF, PPy/C@CF and SA/PPy/C@CF after 30min sonication in water.

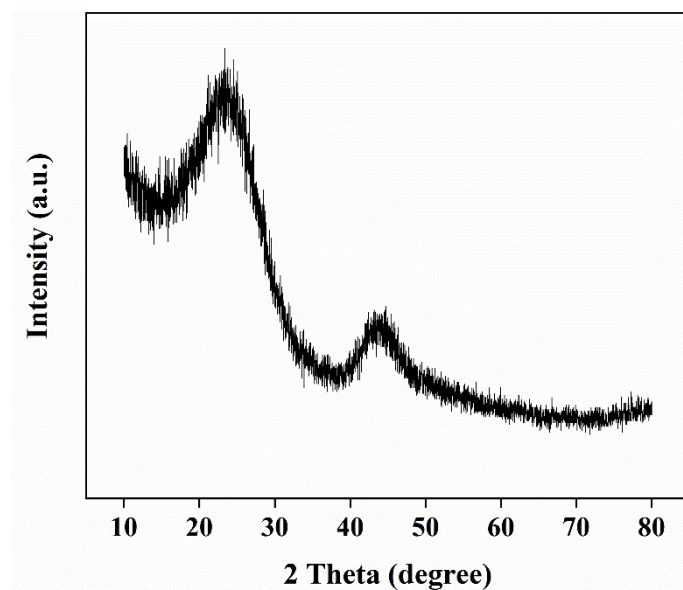

**Fig. S6.** XRD patterns of carbonized corncob powder (C).

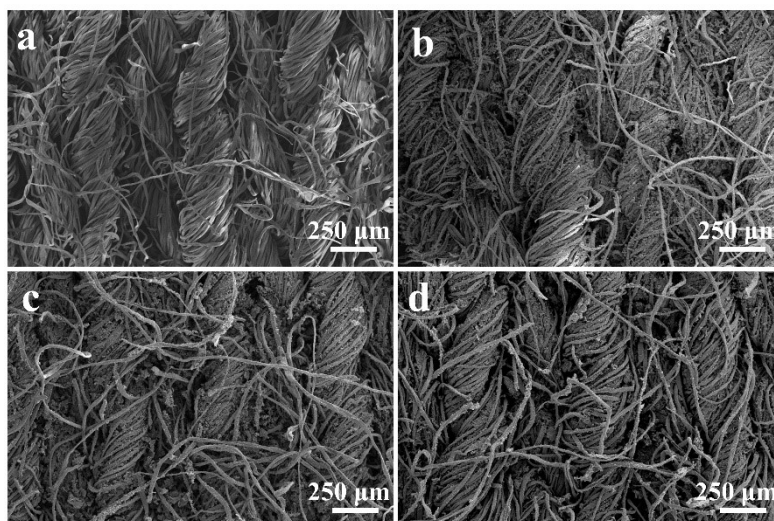

**Fig. S7.** Low magnification SEM images of (a) CF, (b) C@CF, (c) PPy/C@CF, (d) SA/PPy/C@CF.

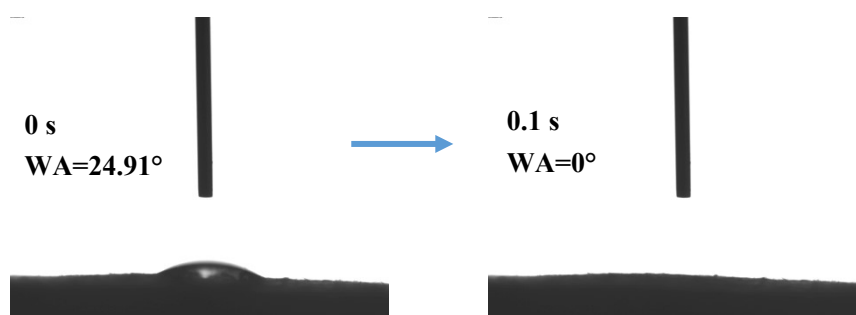

**Fig. S8.** Image of the contact angle of water droplets on the air-laid paper surface over

time.

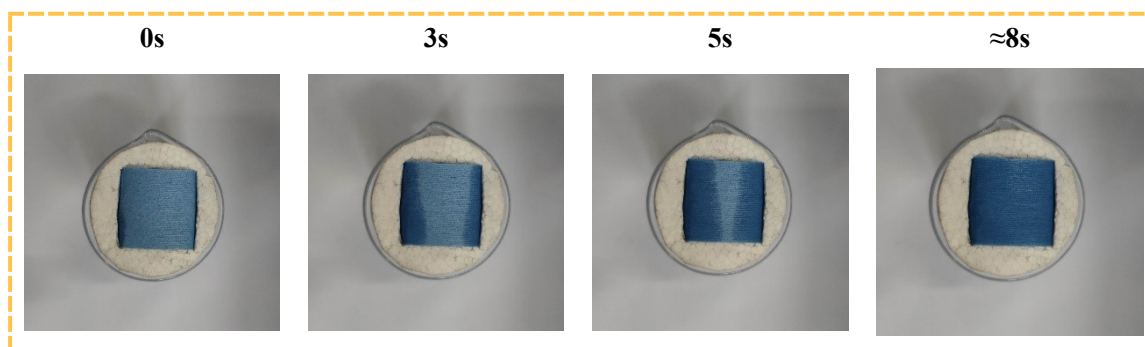

**Fig. S9.** Test of the time it takes for air-laid paper to transport water to the evaporator surface.

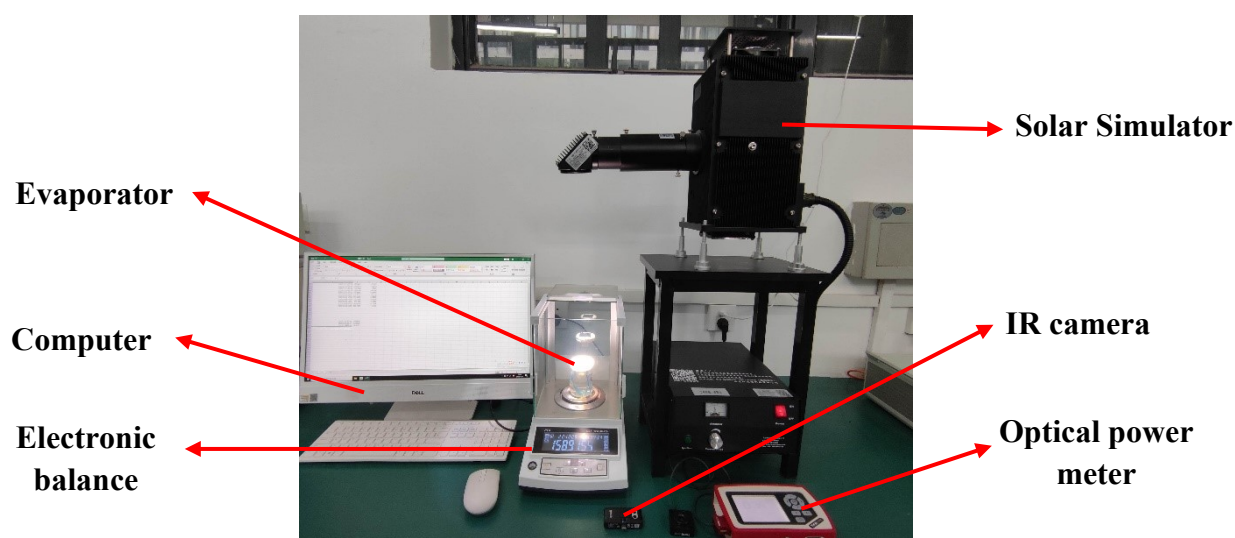

**Fig. S10.** Solar steam generation test system.

**Table S1.** The weight parameters of SA/PPy/C@CF were prepared three times in duplicate.

| Samples | $M_1$ (CF) | $M_2$ (C@CF) | $M_3$ (PPy/C@CF) | $M_4$ (SA/PPy/C@CF) | $\Delta G(M_4-M_1)$ |
|---------|------------|--------------|------------------|---------------------|---------------------|
| 1       | 0.2052 g   | 0.2546 g     | 0.2956 g         | 0.2996 g            | 0.0914 g            |
| 2       | 0.2044 g   | 0.2530 g     | 0.2971 g         | 0.2979 g            | 0.0935 g            |
| 3       | 0.2050 g   | 0.2566 g     | 0.2947 g         | 0.2957 g            | 0.0907 g            |

|         |          |          |          |          |          |
|---------|----------|----------|----------|----------|----------|
| Average | 0.2049 g | 0.2547 g | 0.2958 g | 0.2988 g | 0.0919 g |
|---------|----------|----------|----------|----------|----------|

---

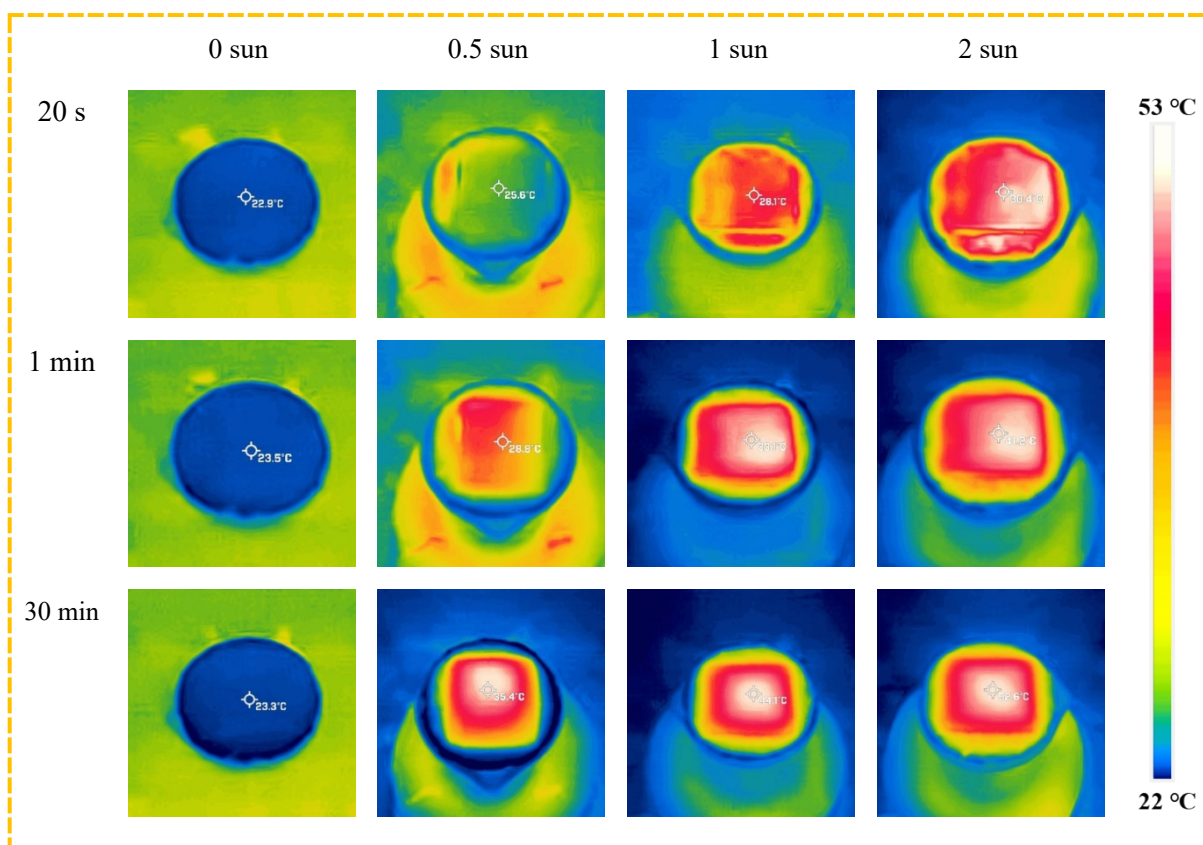

**Fig. S11.** IR images of SA/PPy/C@CF evaporator under different light intensity irradiation.

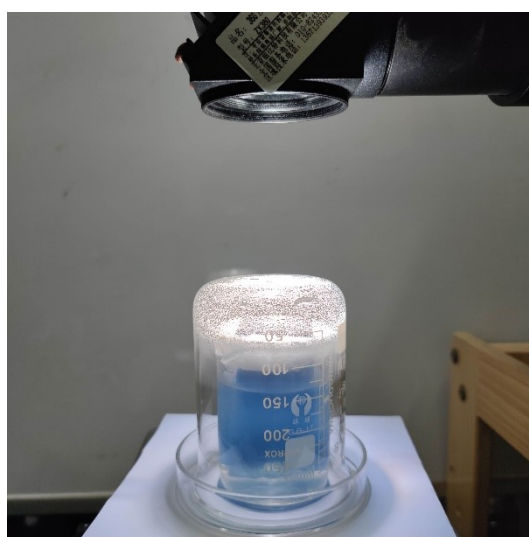

**Fig. S12.** Digital photographs of indoor evaporative condenser.

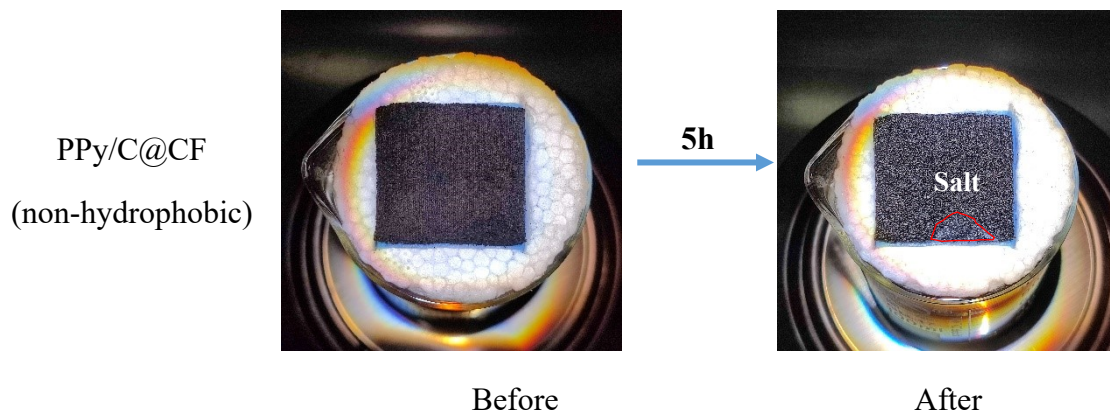

**Fig. S13.** Digital photographs of non-hydrophobic PPy/C@CF for seawater desalination within 5 h under 1 sun.

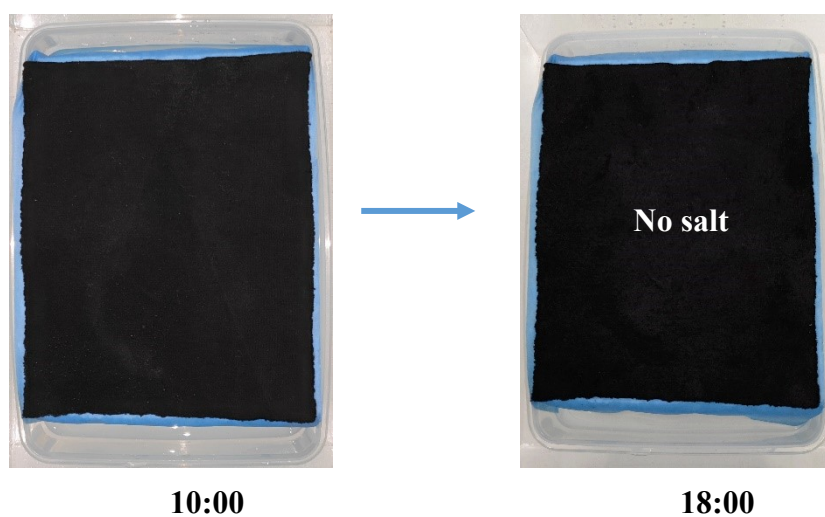

**Fig. S14.** Digital photographs of SA/PPy/C@CF for outdoor seawater desalination.



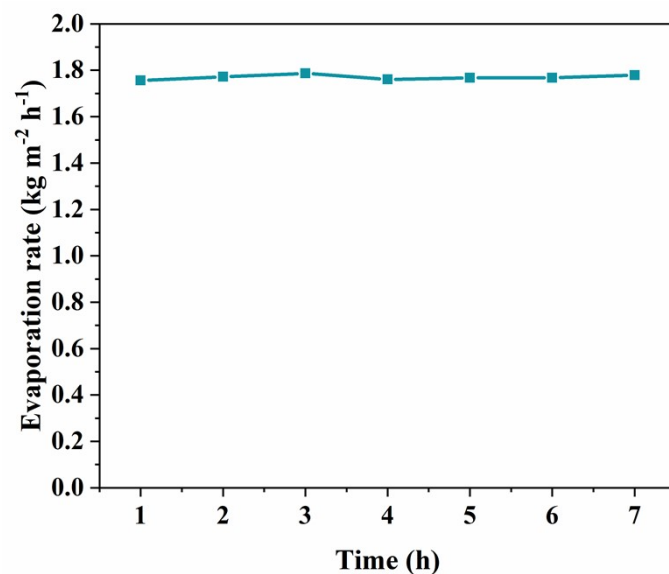

**Fig. S15.** Stability of SA/PPy/C@CF evaporative pump oil-water emulsion.

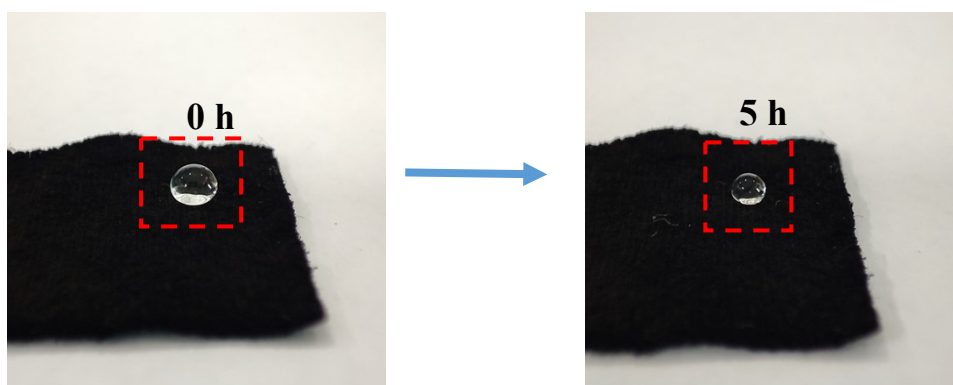

**Fig. S16.** Photos of droplet impregnation process on the surface of SA/PPy/C@CF.

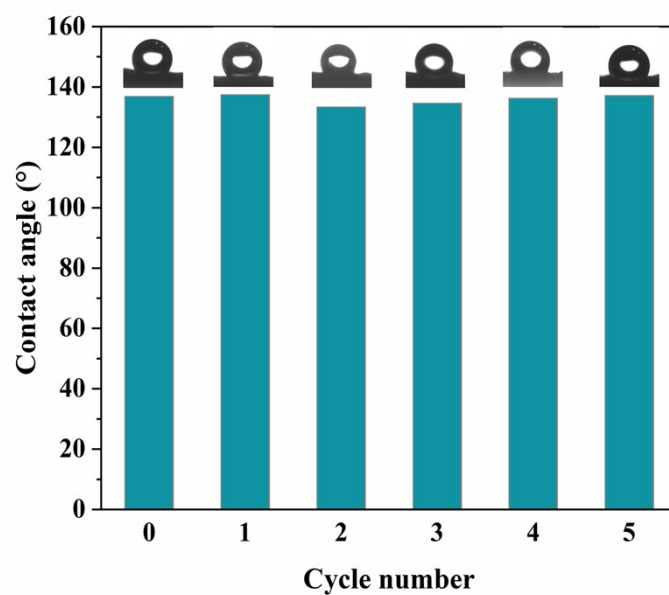

**Fig. S17.** Cyclic hydrophobicity of SA/PPy/C@CF evaporated seawater.

### Calculation of absorption rate

The absorption spectrum is calculated from the reflection and transmission spectra with the following equation:

$$A = 100\% - R - T \quad (\text{Eq. S1})$$

Where the A is absorption, T refer to reflectivity and the R is transmittance.

### Calculation of evaporation efficiency

The solar energy conversion efficiency ( $\eta$ ) was calculated according to the following equation:

$$\eta = \frac{m' \times h_{LV}}{C_{opt} \times q_0} \quad (\text{Eq. S2})$$

where  $m'$  ( $\text{kg m}^{-2} \text{h}^{-1}$ ) is the water evaporation rate calibrated with the dark evaporation rate,  $h_{LV}$  is the equivalent vaporization enthalpy of water in evaporator,  $C_{opt}$  is the optical concentration,  $q_0$  is the power density of 1 sun ( $\text{kW m}^{-2}$ ).

$$m' = m_{light} - m_{dark}$$

where  $m_{light}$  ( $\text{kg m}^{-2} \text{h}^{-1}$ ) is the evaporation rate under 1 sun,  $m_{dark}$  ( $\text{kg m}^{-2} \text{h}^{-1}$ ) is the evaporation rate in the dark.

In this work,  $h_{LV}$  was calculated according to the reported method in reference<sup>1-3</sup>:

$$h_{LV} = \frac{h_{vap} \times m_0}{m_g}$$

where  $h_{vap}$  was the vaporization enthalpy of water at room temperature ( $25^\circ\text{C} = 2443 \text{ J}$ ),  $m_0$  was the evaporation rate of bulk water,  $m_g$  was the evaporation rate of the samples. Notably, here the water and samples had the same surface area, and the evaporation experiments were tested under dark condition with the same environmental temperature and humidity. The corresponding evaporation rates are listed in Table S2. Therefore,  $h_{LV}$  of the samples can be obtained and used in the efficiency calculation.

**Table S2.** Water evaporation rates of bulk water and the samples under dark condition.

| Sample                               | Bulk water | CF     | C@CF   | PPy/C@CF | SA/PPy/C@CF |
|--------------------------------------|------------|--------|--------|----------|-------------|
| Evaporation rate                     | 0.1596     | 0.2103 | 0.1904 | 0.2157   | 0.2242      |
| / kg m <sup>-2</sup> h <sup>-1</sup> |            |        |        |          |             |

**Table S3.** Comparison of evaporation rate and efficiency based on various materials under one sun irradiation.

| Materials                                      | Evaporation rate (kgm <sup>-2</sup> h <sup>-1</sup> ) | Evaporation efficiency (%) | Reference s      |
|------------------------------------------------|-------------------------------------------------------|----------------------------|------------------|
| CB/PMMA/PAN Janus absorber                     | 1.3                                                   | 72                         | 4                |
| Polypyrrole-functionalized pomelo peel (FPyPP) | 1.22                                                  | 76.61                      | 5                |
| Carbonized mushrooms                           | 1.475                                                 | 78                         | 6                |
| SiO <sub>2</sub> @CoFe/C-700                   | 1.26                                                  | 76.81                      | 7                |
| PPy-bamboo                                     | 1.125                                                 | 76.87                      | 8                |
| rGO-MWCNT membrane (G-88C)                     | 1.22                                                  | 80.4                       | 9                |
| PANI/Ag/MWCNTs-COOH/PDA@BC                     | 1.37                                                  | 84.7                       | 10               |
| MCNTs/CPIMs                                    | 1.26                                                  | 72.7                       | 11               |
| M-TiO <sub>2</sub> @Ti                         | 1.57                                                  | 73.5                       | 12               |
| SA/PPy/C@CF                                    | 1.83                                                  | 80.16                      | <b>This work</b> |

## References

1. Q. Chang, Z. Guo, Z. Shen, N. Li, C. Xue, H. Zhang, C. Hao, J. Yang and S. Hu, *Advanced*

- Materials Interfaces*, 2021, **8**, 2100332-2100338.
2. P. Liu, Y. B. Hu, X. Y. Li, L. Xu, C. Chen, B. Yuan and M. L. Fu, *Angew Chem Int Ed Engl*, 2022, **61**, e202208587.
  3. F. Zhao, X. Zhou, Y. Shi, X. Qian, M. Alexander, X. Zhao, S. Mendez, R. Yang, L. Qu and G. Yu, *Nat Nanotechnol*, 2018, **13**, 489-495.
  4. W. Xu, X. Hu, S. Zhuang, Y. Wang, X. Li, L. Zhou, S. Zhu and J. Zhu, *Advanced Energy Materials*, 2018, **8**, 1702884-1702890.
  5. C. Zhang, P. Xiao, F. Ni, L. Yan, Q. Liu, D. Zhang, J. Gu, W. Wang and T. Chen, *ACS Sustainable Chemistry & Engineering*, 2020, **8**, 5328-5337.
  6. N. Xu, X. Hu, W. Xu, X. Li, L. Zhou, S. Zhu and J. Zhu, *Adv Mater*, 2017, **29**, 1606762-1606766.
  7. R. Du, H. Zhu, H. Zhao, H. Lu, C. Dong, M. Liu, F. Yang, J. Yang, J. Wang and J. Pan, *Environ Res*, 2023, **222**, 115365-115377.
  8. P. Zhang, M. Xie, Y. Jin, C. Jin and Z. Wang, *ACS Applied Polymer Materials*, 2022, **4**, 2393-2400.
  9. Y. Wang, C. Wang, X. Song, S. K. Megarajan and H. Jiang, *Journal of Materials Chemistry A*, 2018, **6**, 963-971.
  10. R. Li, C. Zhou, L. Yang, J. Li, G. Zhang, J. Tian and W. Wu, *J Hazard Mater*, 2022, **424**, 127367-127379.
  11. X. Hou, R. Zhang and D. Fang, *Carbon*, 2022, **187**, 310-320.
  12. C. Xue, R. Huang, R. Xue, Q. Chang, N. Li, J. Zhang, S. Hu and J. Yang, *Journal of Alloys and Compounds*, 2022, **909**, 164843 -164853.
